# Supplementary material for: Promotion of Ovarian Follicle Growth following mTOR Activation: Synergistic Effects of AKT Stimulators
Source: PubMed Central journal article supplement (PMC4340052; doi:10.1371/journal.pone.0117769), 2015-02-24
Supplement: pone.0117769.s001.pdf [file pone.0117769.s001.pdf]

## Supplementary Materials:

Promotion of ovarian follicle growth following mTOR activation:  
synergistic effects of AKT stimulators

Yuan Cheng, Jaehong Kim, Xiao Xiao Li, Aaron J. Hsueh\*

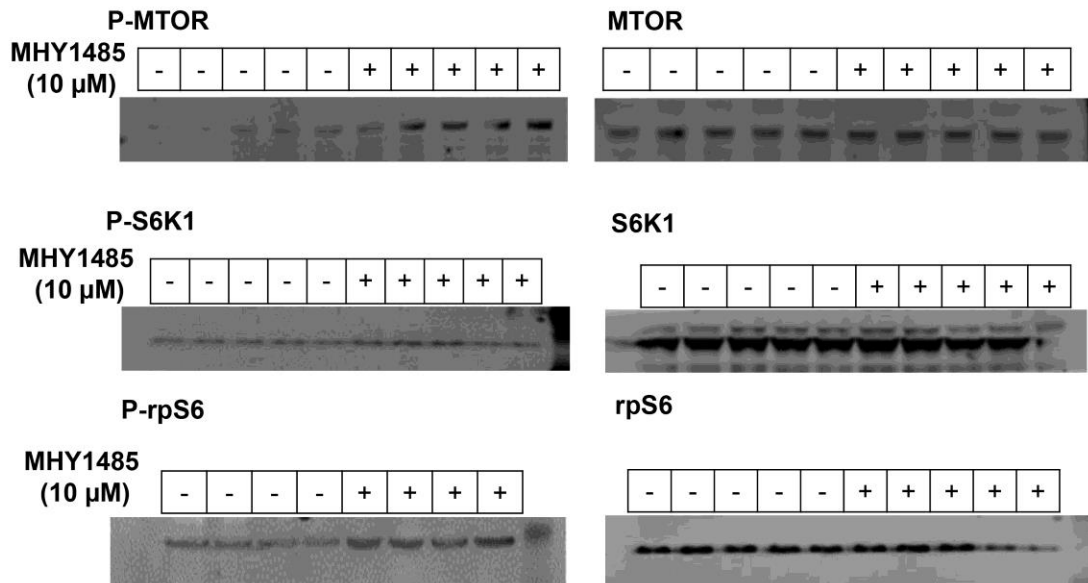

**Supplementary Figure 1** Full-length immunoblotting figures for P-MTOR, MTOR, P-S6K1, S6K1, P-rpS6, and rpS6 are shown.
